# Supplementary material for: Effects of fasting intervention regulating anthropometric and metabolic parameters in subjects with overweight or obesity: a systematic review and meta-analysis
Source: Royal Society of Chemistry journal article supplement (doi:10.1039/d0fo00287a), 2020-01-01
Supplement: d0fo00287a1.pdf [file d0fo00287a1.pdf]

Table S1 Search strategy

| criteria           | Descriptions and search terms used for each criteria                                                                                                                                                                                                                                                                                                                                                                                                                                                                                                                                                                                                                                                    |
|--------------------|---------------------------------------------------------------------------------------------------------------------------------------------------------------------------------------------------------------------------------------------------------------------------------------------------------------------------------------------------------------------------------------------------------------------------------------------------------------------------------------------------------------------------------------------------------------------------------------------------------------------------------------------------------------------------------------------------------|
| Patient/population | Patients with overweight or obesity ( <i>overweight OR obesity OR obese OR obes* OR fat OR fatness OR weight gain OR weight maintenance OR weight management OR over nutrition OR over weight</i> )                                                                                                                                                                                                                                                                                                                                                                                                                                                                                                     |
| Intervention       | Fasting intervention ( <i>Fasting OR fast* OR sporadic fast* OR 800*kcal OR 500 calorie* OR very low calorie diet OR intermittent fasting OR intermittent fast* OR intermittent energy restriction* OR intermittent calori* restriction* OR intermittent restrictive diet* OR alternate-day fast* OR alternate day fast* OR alternate day fasting OR alternate-day fasting OR continuous energy restriction* OR continuous calori* restriction* OR continuous restrictive diet* OR fasting calorie restriction intervention* OR very low calorie diet* OR periodic fasting* OR Modified fasting regimen OR Modified fast* OR Modified fasting OR Time-restricted feed* OR Time-restricted feeding</i> ) |
| Type               | RCT ( <i>randomized controlled trial OR RCT OR prospective OR controlled clinical trial OR prospective clinical trial OR randomized clinical trial</i> ) AND ( <i>human</i> )                                                                                                                                                                                                                                                                                                                                                                                                                                                                                                                           |
