# Supplementary material for: Effects of fasting intervention regulating anthropometric and metabolic parameters in subjects with overweight or obesity: a systematic review and meta-analysis
Source: Royal Society of Chemistry journal article supplement (doi:10.1039/d0fo00287a), 2020-01-01
Supplement: d0fo00287a2.pdf [file d0fo00287a2.pdf]

**Bowen J et al. 2018**

|               |                                                                                                                                                                                                                                                                                                                                                                                                                                                                                                                                                                                                                                                                                                                               |
|---------------|-------------------------------------------------------------------------------------------------------------------------------------------------------------------------------------------------------------------------------------------------------------------------------------------------------------------------------------------------------------------------------------------------------------------------------------------------------------------------------------------------------------------------------------------------------------------------------------------------------------------------------------------------------------------------------------------------------------------------------|
| Methods       | RCT, (modified, alternate day fasting meal replacement program (ADF + DER) vs. daily continuous energy restriction meal replacement program (DER))<br>16 weeks<br>Summary risk of bias: low to moderate                                                                                                                                                                                                                                                                                                                                                                                                                                                                                                                       |
| Participants  | Adults with overweight/obesity (aged 25–60 years; Body Mass Index (BMI) >27.0 kg/m <sup>2</sup> ) were recruited.<br>N: 67 intervention, 68 control<br>Age in years (Mean ± SD): 40.0 ± 8.3 intervention, 40.6 ± 8.8 control<br>Gender: 15 males/67 females intervention, 16 males /65 females control<br>Location: Australia                                                                                                                                                                                                                                                                                                                                                                                                 |
| Interventions | Type: alternate day modified fasting(ADMF)<br>Comparison: ADF + DER vs. DER<br>Intervention: Participants allocated to the ADF + DER group followed the DER program for three set days per week (Monday, Wednesday, and Friday)(5000kJ) and alternated with three set modified fasting days (Tuesday, Thursday, and Sunday) (2400kJ).<br>Control: 5000kJ/d<br>Compliance: Participants met individually with a study dietitian every two weeks until week 16. These visits included: troubleshooting, a review of dietary compliance which was assessed by a self-completed 14-day checklist, and a self-rated assessment of compliance to the dietary program on a scale out of 5 stars.<br>Length of intervention: 16 weeks |
| Outcomes      | Main study outcome: participant retention and change in body weight.<br>Dropouts:15 intervention, 13 control<br>Available outcomes: anthropometric and metabolic index                                                                                                                                                                                                                                                                                                                                                                                                                                                                                                                                                        |
| Notes         | The variable of gender and age include dropout.                                                                                                                                                                                                                                                                                                                                                                                                                                                                                                                                                                                                                                                                               |

***Risk of bias***

| Bias                                           | Authors' judgment | Support for judgment                                                                                                               |
|------------------------------------------------|-------------------|------------------------------------------------------------------------------------------------------------------------------------|
| Random sequence generation<br>(selection bias) | Low risk          | This was a randomized clinical trial.                                                                                              |
| Allocation concealment<br>(selection bias)     | Low risk          | Randomization procedures were performed by researchers who were independent of delivering the intervention and assessing outcomes. |
| Blinding of participants and                   | High risk         | Participants and research                                                                                                          |

|                                                                    |          |                                                                                                                                                                                                                                                                                                                                             |
|--------------------------------------------------------------------|----------|---------------------------------------------------------------------------------------------------------------------------------------------------------------------------------------------------------------------------------------------------------------------------------------------------------------------------------------------|
| personnel (performance bias)<br>All outcomes                       |          | dietitians delivering intervention<br>content could not be blinded                                                                                                                                                                                                                                                                          |
| Blinding of outcome<br>assessment (detection bias)<br>All outcomes | Low risk | The remaining study team was<br>blinded to the randomization.                                                                                                                                                                                                                                                                               |
| Incomplete outcome data<br>(attrition bias)<br>All outcomes        | Low risk | Participant flow well described.                                                                                                                                                                                                                                                                                                            |
| Selective reporting (reporting<br>bias)                            | Low risk | Clinical Trial Center by code no.<br>ACTRN12616000110482                                                                                                                                                                                                                                                                                    |
| Attention                                                          | Low risk | All participants appear to have<br>had similar frequency and<br>quantity of attention and follow-<br>up.                                                                                                                                                                                                                                    |
| Compliance                                                         | Low risk | Participants met individually with<br>a study dietitian every two weeks<br>until week 16. These visits<br>included: troubleshooting, a<br>review of dietary compliance<br>which was assessed by a self-<br>completed 14-day checklist, and<br>a self-rated assessment of<br>compliance to the dietary<br>program on a scale out of 5 stars. |
| Other bias                                                         | Low risk | No commercial company<br>involved, and no conflict of<br>interest.                                                                                                                                                                                                                                                                          |

**Varady KA et al.2013**

|               |                                                                                                                                                                                                                                                                                                                                                                                                                                                                                                                                                                                                                                                                                                                                                          |
|---------------|----------------------------------------------------------------------------------------------------------------------------------------------------------------------------------------------------------------------------------------------------------------------------------------------------------------------------------------------------------------------------------------------------------------------------------------------------------------------------------------------------------------------------------------------------------------------------------------------------------------------------------------------------------------------------------------------------------------------------------------------------------|
| Methods       | RCT, (ADMF vs. control)<br>12 weeks<br>Summary risk of bias: moderate                                                                                                                                                                                                                                                                                                                                                                                                                                                                                                                                                                                                                                                                                    |
| Participants  | BMI between 20 and 29.9 kg/m <sup>2</sup> ; age between 35 and 65 years<br>N: 15 intervention, 15 control<br>Age in years (Mean ± SD): 47±3 intervention, 48±2 control<br>Gender: 5 males/10 females intervention, 3 males /12 females control<br>Location: US                                                                                                                                                                                                                                                                                                                                                                                                                                                                                           |
| Interventions | Type: ADMF<br>Comparison: ADMF vs. control<br>Intervention: ADMF subjects consumed 25% of their baseline energy needs on the fast day (24 h)(400-600kcal), and then ate ad libitum on each alternating feed day (24 h).<br>Control: Control subjects were permitted to eat ad libitum every day, and were not provided with meals from the research center.<br>Compliance: To assess energy intake on the fast days, ADF subjects were asked to report any extra food items consumed. Additionally, subjects were instructed to return any leftover food items to the HNRU for weighing. At baseline, the Research Dietician provided 15 min of instruction to all participants on how to complete the food records.<br>Length of intervention: 12 weeks |
| Outcomes      | Main study outcome: Hunger, satisfaction, and fullness; Weight loss and body composition; Lipid coronary heart disease risk factors; Non-lipid coronary heart disease risk factors<br>Dropouts:1 intervention, 1 control<br>Available outcomes: anthropometric and metabolic index                                                                                                                                                                                                                                                                                                                                                                                                                                                                       |

***Risk of bias***

| <b>Bias</b>                                                               | <b>Authors' judgment</b> | <b>Support for judgment</b>                                                                |
|---------------------------------------------------------------------------|--------------------------|--------------------------------------------------------------------------------------------|
| Random sequence generation<br>(selection bias)                            | Low risk                 | This was a randomized clinical trial.                                                      |
| Allocation concealment<br>(selection bias)                                | Low risk                 | Subjects were randomized by KAV by way of a stratified random sample.                      |
| Blinding of participants and personnel (performance bias)<br>All outcomes | High risk                | Participants and research dietitians delivering intervention content could not be blinded. |
| Blinding of outcome assessment (detection bias)<br>All outcomes           | High risk                | No blinded.                                                                                |
| Incomplete outcome data                                                   | Low risk                 | Participant flow well described.                                                           |

|                                      |              |                                                                                                                                                                                                                                                                                                                                           |
|--------------------------------------|--------------|-------------------------------------------------------------------------------------------------------------------------------------------------------------------------------------------------------------------------------------------------------------------------------------------------------------------------------------------|
| (attrition bias)<br>All outcomes     |              |                                                                                                                                                                                                                                                                                                                                           |
| Selective reporting (reporting bias) | Unclear risk | Although the design accorded to RCT specifications, the clinical registration number was lacked.                                                                                                                                                                                                                                          |
| Attention                            | Low risk     | All participants appear to have had similar frequency and quantity of attention and follow-up.                                                                                                                                                                                                                                            |
| Compliance                           | Low risk     | To assess energy intake on the fast days, ADF subjects were asked to report any extra food items consumed. Additionally, subjects were instructed to return any leftover food items to the HNRU for weighing. At baseline, the Research Dietician provided 15 min of instruction to all participants on how to complete the food records. |
| Other bias                           | Low risk     | No commercial company involved, and no conflict of interest.                                                                                                                                                                                                                                                                              |

**Bhutani S et al.2013**

|               |                                                                                                                                                                                                                                                                                                                                                                                                                                                                                                                                                                                                                                                                                                                                                                      |
|---------------|----------------------------------------------------------------------------------------------------------------------------------------------------------------------------------------------------------------------------------------------------------------------------------------------------------------------------------------------------------------------------------------------------------------------------------------------------------------------------------------------------------------------------------------------------------------------------------------------------------------------------------------------------------------------------------------------------------------------------------------------------------------------|
| Methods       | RCT, (ADMF vs. control)<br>12 weeks<br>Summary risk of bias: moderate                                                                                                                                                                                                                                                                                                                                                                                                                                                                                                                                                                                                                                                                                                |
| Participants  | 83 were deemed eligible to participate according to a preliminary questionnaire and body mass index (BMI) assessment<br>N: 16 intervention, 16 control<br>Age in years (Mean $\pm$ SD): 42 $\pm$ 2 intervention, 49 $\pm$ 2 control<br>Gender: 1 males/24 females intervention, 1 males /15 females control<br>Location: US                                                                                                                                                                                                                                                                                                                                                                                                                                          |
| Interventions | Type: ADMF<br>Comparison: ADMF vs. control<br>Intervention: participants consumed 25% of their baseline energy needs on the “fast day” (24 h) and consumed food ad libitum on each “feed day” (24 h).<br>Control: Control subjects were permitted to eat ad libitum every day<br>Compliance: The diet consisted of a 3-day rotating menu plan, and all fast day meals were prepared in the metabolic kitchen of the Human Nutrition Research Unit (HNRU). Fast day meals were consumed between 12.00 pm and 2.00 pm to ensure that each subject was undergoing the same duration of fasting. each subject met with a dietician at the beginning of each week to learn how to maintain the ADF regimen on his or her own at home.<br>Length of intervention: 12 weeks |
| Outcomes      | Main study outcome: body weight, body composition, and coronary heart disease(CHD) risk reduction<br>Dropouts:9 intervention, 0 control<br>Available outcomes: anthropometric and metabolic index                                                                                                                                                                                                                                                                                                                                                                                                                                                                                                                                                                    |
| Notes         | The variable of gender and age include dropout.                                                                                                                                                                                                                                                                                                                                                                                                                                                                                                                                                                                                                                                                                                                      |

***Risk of bias***

| <b>Bias</b>                                                               | <b>Authors' judgment</b> | <b>Support for judgment</b>                                                                |
|---------------------------------------------------------------------------|--------------------------|--------------------------------------------------------------------------------------------|
| Random sequence generation<br>(selection bias)                            | Low risk                 | This was a randomized clinical trial.                                                      |
| Allocation concealment<br>(selection bias)                                | Low risk                 | Subjects were recruited and randomized by the clinical coordinator (SB).                   |
| Blinding of participants and personnel (performance bias)<br>All outcomes | High risk                | Participants and research dietitians delivering intervention content could not be blinded. |
| Blinding of outcome assessment (detection bias)                           | High risk                | No blinded.                                                                                |

|                                                             |              |                                                                                                                                                                                                                                                                                                                                                                                                                                                                             |
|-------------------------------------------------------------|--------------|-----------------------------------------------------------------------------------------------------------------------------------------------------------------------------------------------------------------------------------------------------------------------------------------------------------------------------------------------------------------------------------------------------------------------------------------------------------------------------|
| All outcomes                                                |              |                                                                                                                                                                                                                                                                                                                                                                                                                                                                             |
| Incomplete outcome data<br>(attrition bias)<br>All outcomes | Low risk     | Participant flow well described.                                                                                                                                                                                                                                                                                                                                                                                                                                            |
| Selective reporting (reporting<br>bias)                     | Unclear risk | Although the design accorded to<br>RCT specifications, the clinical<br>registration number was lacked.                                                                                                                                                                                                                                                                                                                                                                      |
| Attention                                                   | Low risk     | No problem with attention bias.                                                                                                                                                                                                                                                                                                                                                                                                                                             |
| Compliance                                                  | Low risk     | The diet consisted of a 3-day<br>rotating menu plan, and all fast<br>day meals were prepared in the<br>metabolic kitchen of the Human<br>Nutrition Research Unit (HNURU).<br>Fast day meals were consumed<br>between 12.00 pm and 2.00 pm to<br>ensure that each subject was<br>undergoing the same duration of<br>fasting. each subject met with a<br>dietician at the beginning of each<br>week to learn how to maintain the<br>ADF regimen on his or her own<br>at home. |
| Other bias                                                  | Low risk     | No commercial company<br>involved, and no conflict of<br>interest.                                                                                                                                                                                                                                                                                                                                                                                                          |

**Catenacci VA et al.2016**

|               |                                                                                                                                                                                                                                                                                                                                                                                                                                                                                                                                                                                                                                                                  |
|---------------|------------------------------------------------------------------------------------------------------------------------------------------------------------------------------------------------------------------------------------------------------------------------------------------------------------------------------------------------------------------------------------------------------------------------------------------------------------------------------------------------------------------------------------------------------------------------------------------------------------------------------------------------------------------|
| Methods       | RCT, (zero-calorie alternate-day fasting vs. control)<br>8 weeks<br>Summary risk of bias: high                                                                                                                                                                                                                                                                                                                                                                                                                                                                                                                                                                   |
| Participants  | Respondents who met initial eligibility criteria (18-55 years, BMI $\geq 30$ kg/m <sup>2</sup> , non-smoker, $\leq 4.5$ kg weight change over past 6 months) were invited to a screening visit.<br>N: 13 intervention, 12 control<br>Age in years (Mean $\pm$ SD): 39.6 $\pm$ 9.5 intervention, 42.7 $\pm$ 7.9 control<br>Gender: 3 males/10 females intervention, 3 males /9 females control<br>Location: US                                                                                                                                                                                                                                                    |
| Interventions | Type: complete alternate-day fasting(CADF)<br>Comparison: CADF vs. control<br>Intervention: CADF participants were instructed to begin their fast after the evening meal the preceding day, and to consume only water, calorie-free beverages and bouillon/stock cube soup.<br>Control: daily caloric restriction<br>Compliance: All food during the 8-week intervention was provided by the CTRC metabolic kitchen; participants collected pre-prepared research meals twice weekly. Participants were instructed to return any uneaten food for weigh-back and to report any foods eaten in addition to the research meals.<br>Length of intervention: 8 weeks |
| Outcomes      | Main study outcome: Participant Characteristics; Safety Assessments; Body Weight and Body Composition; Lipids and Insulin Sensitivity; Leptin, Ghrelin, and BDNF<br>Dropouts:2 intervention, 2 control<br>Available outcomes: anthropometric and metabolic index                                                                                                                                                                                                                                                                                                                                                                                                 |

***Risk of bias***

| <b>Bias</b>                                                               | <b>Authors' judgment</b> | <b>Support for judgment</b>                                                                |
|---------------------------------------------------------------------------|--------------------------|--------------------------------------------------------------------------------------------|
| Random sequence generation<br>(selection bias)                            | Low risk                 | This was a randomized clinical trial.                                                      |
| Allocation concealment<br>(selection bias)                                | Unclear risk             | Not described                                                                              |
| Blinding of participants and personnel (performance bias)<br>All outcomes | High risk                | Participants and research dietitians delivering intervention content could not be blinded. |
| Blinding of outcome assessment (detection bias)<br>All outcomes           | High risk                | No blinded.                                                                                |
| Incomplete outcome data<br>(attrition bias)                               | Low risk                 | Participant flow well described.                                                           |

| All outcomes                         |              |                                                                                                                                                                                                                                                                                              |
|--------------------------------------|--------------|----------------------------------------------------------------------------------------------------------------------------------------------------------------------------------------------------------------------------------------------------------------------------------------------|
| Selective reporting (reporting bias) | Unclear risk | Although the design accorded to RCT specifications, the clinical registration number was lacked.                                                                                                                                                                                             |
| Attention                            | Low risk     | No problem with attention bias.                                                                                                                                                                                                                                                              |
| Compliance                           | Low risk     | All food during the 8-week intervention was provided by the CTMC metabolic kitchen; participants collected pre-prepared research meals twice weekly. Participants were instructed to return any uneaten food for weigh-back and to report any foods eaten in addition to the research meals. |
| Other bias                           | Unclear risk | evaluation comprehensively                                                                                                                                                                                                                                                                   |



**Hutchison AT et al.2019**

|               |                                                                                                                                                                                                                                                                                                                                                                                                                                                                                                                                                                                                                                                                                               |
|---------------|-----------------------------------------------------------------------------------------------------------------------------------------------------------------------------------------------------------------------------------------------------------------------------------------------------------------------------------------------------------------------------------------------------------------------------------------------------------------------------------------------------------------------------------------------------------------------------------------------------------------------------------------------------------------------------------------------|
| Methods       | RCT, (zero-calorie alternate-day fasting vs. control)<br>8 weeks<br>Summary risk of bias: moderate to high                                                                                                                                                                                                                                                                                                                                                                                                                                                                                                                                                                                    |
| Participants  | Aged 35 to 70 years women were screened to participate in this single-center, randomized controlled trial.<br>N: 22 intervention①, 22 intervention②,11 control<br>Age in years (Mean±SD): 51±2 intervention①, 49±2intervention ②, 49±3 control<br>Gender: 0 males/22 females intervention①, 0 males/22 females intervention②, 0 males /11 females control<br>Location: Australia                                                                                                                                                                                                                                                                                                              |
| Interventions | Type: CADF<br>Comparison: CADF vs. control<br>Intervention: During the fast, participants were allowed water, small amounts of energy-free foods, black coffee, and/or tea and were provided with 250 mL of very-low-energy.<br>Control: 100% of calculated baseline energy requirements daily.<br>Compliance: Participants completed daily checklists to monitor adherence, and energy intake in weeks 1, 4, and 7 was calculated from 7-day food diaries using Food Works. Participants attended clinic weekly, where they returned the 7-day checklist from the previous week, were weighed, and received individual counseling to maintain compliance.<br>Length of intervention: 8 weeks |
| Outcomes      | Main study outcome: anthropometric and metabolic index<br>Dropouts:3 intervention①, 3 intervention②, 1 control<br>Available outcomes: anthropometric and metabolic index                                                                                                                                                                                                                                                                                                                                                                                                                                                                                                                      |

***Risk of bias***

| <b>Bias</b>                                                            | <b>Authors' judgment</b> | <b>Support for judgment</b>                                                                |
|------------------------------------------------------------------------|--------------------------|--------------------------------------------------------------------------------------------|
| Random sequence generation (selection bias)                            | Low risk                 | This was a randomized clinical trial.                                                      |
| Allocation concealment (selection bias)                                | High risk                | Block randomization (four or eight participants) was performed by a research officer       |
| Blinding of participants and personnel (performance bias) All outcomes | High risk                | Participants and research dietitians delivering intervention content could not be blinded. |
| Blinding of outcome assessment (detection bias) All outcomes           | High risk                | No blinded.                                                                                |
| Incomplete outcome data (attrition bias)                               | Low risk                 | Participant flow well described.                                                           |

| All outcomes                         |              |                                                                                                                                                                                                                                                                                                                                             |
|--------------------------------------|--------------|---------------------------------------------------------------------------------------------------------------------------------------------------------------------------------------------------------------------------------------------------------------------------------------------------------------------------------------------|
| Selective reporting (reporting bias) | Low risk     | Clinical Trial Center by code NCT01769976                                                                                                                                                                                                                                                                                                   |
| Attention                            | Low risk     | All participants appear to have had similar frequency and quantity of attention and follow-up.                                                                                                                                                                                                                                              |
| Compliance                           | Low risk     | Participants completed daily checklists to monitor adherence, and energy intake in weeks 1, 4, and 7 was calculated from 7-day food diaries using Food Works. Participants attended clinic weekly, where they returned the 7-day checklist from the previous week, were weighed, and received individual counseling to maintain compliance. |
| Other bias                           | Unclear risk | evaluation comprehensively                                                                                                                                                                                                                                                                                                                  |

**Moro T et al.2016**

|         |                                                                                                                     |
|---------|---------------------------------------------------------------------------------------------------------------------|
| Methods | RCT, (time-restricted feeding (TRF) vs. normal diet group (ND))<br>8 weeks<br>Summary risk of bias: low to moderate |
|---------|---------------------------------------------------------------------------------------------------------------------|

|               |                                                                                                                                                                                                                                                                                                                                                                                                                                                                                                                                                                                                                                      |
|---------------|--------------------------------------------------------------------------------------------------------------------------------------------------------------------------------------------------------------------------------------------------------------------------------------------------------------------------------------------------------------------------------------------------------------------------------------------------------------------------------------------------------------------------------------------------------------------------------------------------------------------------------------|
| Participants  | <p>34 subjects (age <math>29.21 \pm 3.8</math>; weight <math>84.6 \pm 6.2</math> kg) were randomly assigned to a time-restricted feeding group or standard diet group</p> <p>N: 17 intervention, 17 control</p> <p>Age in years (Mean<math>\pm</math>SD): <math>29.9\pm 4.1</math> intervention, <math>28.5\pm 3.5</math> control</p> <p>Gender: 17 males/0 females intervention, 17 males /0 females control</p> <p>Location: Italy</p>                                                                                                                                                                                             |
| Interventions | <p>Type: TRF</p> <p>Comparison: TRF vs. ND</p> <p>Intervention: TRF subjects consumed 100 % of their energy needs divided into three meals consumed at 1 p.m., 4 p.m. and 8 p.m., and fasted for the remaining 16 h per 24-h period.</p> <p>Control: ND group ingested their caloric intake as three meals consumed at 8 a.m., 1 p.m. and 8 p.m.</p> <p>Compliance: Every week, subjects were contacted by a dietician in order to check the adherence to the diet protocol. The dietician performed a structured interview about meal timing and composition to obtain this information.</p> <p>Length of intervention: 8 weeks</p> |
| Outcomes      | <p>Main study outcome: anthropometric and metabolic index</p> <p>Dropouts: 0</p> <p>Available outcomes: anthropometric and metabolic index</p>                                                                                                                                                                                                                                                                                                                                                                                                                                                                                       |

### ***Risk of bias***

| <b>Bias</b>                                                               | <b>Authors' judgment</b> | <b>Support for judgment</b>                                                                      |
|---------------------------------------------------------------------------|--------------------------|--------------------------------------------------------------------------------------------------|
| Random sequence generation<br>(selection bias)                            | Low risk                 | This was a randomized clinical trial.                                                            |
| Allocation concealment<br>(selection bias)                                | Low risk                 | 34 subjects were randomly assigned through computer generated software.                          |
| Blinding of participants and personnel (performance bias)<br>All outcomes | High risk                | Participants and research dietitians delivering intervention content could not be blinded.       |
| Blinding of outcome assessment (detection bias)<br>All outcomes           | Low risk                 | The research staff conducting outcome assessments was unaware of the assignment of the subjects. |
| Incomplete outcome data<br>(attrition bias)<br>All outcomes               | Low risk                 | There was no drop out.                                                                           |
| Selective reporting (reporting bias)                                      | Unclear risk             | Although the design accorded to RCT specifications, the clinical registration number was lacked. |

|            |          |                                                                                                                                                                                                                       |
|------------|----------|-----------------------------------------------------------------------------------------------------------------------------------------------------------------------------------------------------------------------|
| Attention  | Low risk | All participants appear to have had similar frequency and quantity of attention and follow-up.                                                                                                                        |
| Compliance | Low risk | Every week, subjects were contacted by a dietician in order to check the adherence to the diet protocol. The dietician performed a structured interview about meal timing and composition to obtain this information. |
| Other bias | Low risk | No commercial company involved, and no conflict of interest.                                                                                                                                                          |

**Tinsley GM et al.2017**

Methods RCT, (TRF vs. control group)

|               |                                                                                                                                                                                                                                                                                                                                                                                                                                                     |
|---------------|-----------------------------------------------------------------------------------------------------------------------------------------------------------------------------------------------------------------------------------------------------------------------------------------------------------------------------------------------------------------------------------------------------------------------------------------------------|
|               | 8 weeks<br>Summary risk of bias: moderate to high                                                                                                                                                                                                                                                                                                                                                                                                   |
| Participants  | Generally healthy, recreationally active men<br>N: 10 intervention, 8 control<br>Age in years (Mean±SD): 22.9±4.1 intervention, 22.0±2.4 control<br>Gender: 10 males/0 females intervention, 8 males /0 females control<br>Location: US                                                                                                                                                                                                             |
| Interventions | Type: TRF<br>Comparison: TRF vs. control group<br>Intervention: Participants were required to consume all calories in any four-hour window between 4 p.m. and midnight.<br>Control: Participants in the control group were instructed to follow their normal dietary patterns.<br>Compliance: Throughout the duration of the study, daily checklists were completed in order to assess adherence to the TRF days<br>Length of intervention: 8 weeks |
| Outcomes      | Main study outcome: Body composition results<br>Dropouts:10<br>Available outcomes: anthropometric index                                                                                                                                                                                                                                                                                                                                             |

***Risk of bias***

| <b>Bias</b>                                                               | <b>Authors' judgment</b> | <b>Support for judgment</b>                                                                      |
|---------------------------------------------------------------------------|--------------------------|--------------------------------------------------------------------------------------------------|
| Random sequence generation<br>(selection bias)                            | Low risk                 | This was a randomized clinical trial.                                                            |
| Allocation concealment<br>(selection bias)                                | Unclear risk             | Not described                                                                                    |
| Blinding of participants and personnel (performance bias)<br>All outcomes | High risk                | Participants and research dietitians delivering intervention content could not be blinded.       |
| Blinding of outcome assessment (detection bias)<br>All outcomes           | High risk                | No blinded.                                                                                      |
| Incomplete outcome data<br>(attrition bias)<br>All outcomes               | Low risk                 | Participant flow well described.                                                                 |
| Selective reporting (reporting bias)                                      | Unclear risk             | Although the design accorded to RCT specifications, the clinical registration number was lacked. |
| Attention                                                                 | Low risk                 | All participants appear to have had similar frequency and quantity of attention and follow-up.   |

|            |          |                                                                                                                     |
|------------|----------|---------------------------------------------------------------------------------------------------------------------|
| Compliance | Low risk | Throughout the duration of the study, daily checklists were completed in order to assess adherence to the TRF days. |
| Other bias | Low risk | No commercial company involved, and no conflict of interest.                                                        |

**Li C et al.2017**

Methods

RCT, ( one-week fasting vs. control group)

|               |                                                                                                                                                                                                                                                                                                                                                                                                                                                                                                                                            |
|---------------|--------------------------------------------------------------------------------------------------------------------------------------------------------------------------------------------------------------------------------------------------------------------------------------------------------------------------------------------------------------------------------------------------------------------------------------------------------------------------------------------------------------------------------------------|
|               | 1 week<br>Summary risk of bias: moderate                                                                                                                                                                                                                                                                                                                                                                                                                                                                                                   |
| Participants  | Patients with manifest T2DM medically treated with oral hypoglycemic agents and/or insulin.<br>N: 16 intervention, 16 control<br>Age in years (Mean±SD): 64.7±7.0intervention, 65.4±5.7 control<br>Location: Germany                                                                                                                                                                                                                                                                                                                       |
| Interventions | Type: very low calorie diet( VLCD)<br>Comparison: one-week fasting vs. control group<br>Intervention: During the fasting period, participants received unrestricted amounts of water, herbal tea (no black or green tea), 200 ml fruit juice and small standardized quantities of light vegetable soup with a maximum total daily energy intake of 1 255 kJ (300 kcal)<br>Control: normal dietary<br>Compliance: Compliance was recorded using personal interviews by study physicians and study nurses.<br>Length of intervention: 1 week |
| Outcomes      | Main study outcome: weight and metabolic outcomes<br>Dropouts: 7 intervention, 7 control<br>Available outcomes: anthropometric and metabolic index                                                                                                                                                                                                                                                                                                                                                                                         |
| Notes         | The variable of gender and age include dropout.                                                                                                                                                                                                                                                                                                                                                                                                                                                                                            |

***Risk of bias***

| <b>Bias</b>                                                               | <b>Authors' judgment</b> | <b>Support for judgment</b>                                                                                                                                                                                                            |
|---------------------------------------------------------------------------|--------------------------|----------------------------------------------------------------------------------------------------------------------------------------------------------------------------------------------------------------------------------------|
| Random sequence generation<br>(selection bias)                            | Low risk                 | This was a randomized clinical trial.                                                                                                                                                                                                  |
| Allocation concealment<br>(selection bias)                                | Low risk                 | Participants were randomly allocated to treatment groups following a non-stratified block-randomization with randomly varying block lengths based on the "ranuni" pseudo-random number generator of the SAS/Base® statistical software |
| Blinding of participants and personnel (performance bias)<br>All outcomes | High risk                | Participants and research dietitians delivering intervention content could not be blinded.                                                                                                                                             |
| Blinding of outcome assessment (detection bias)<br>All outcomes           | High risk                | No blinded.                                                                                                                                                                                                                            |
| Incomplete outcome data<br>(attrition bias)                               | Low risk                 | Participant flow well described.                                                                                                                                                                                                       |

| All outcomes                         |              |                                                                                                  |
|--------------------------------------|--------------|--------------------------------------------------------------------------------------------------|
| Selective reporting (reporting bias) | Unclear risk | Although the design accorded to RCT specifications, the clinical registration number was lacked. |
| Attention                            | Low risk     | All participants appear to have had similar frequency and quantity of attention and follow-up.   |
| Compliance                           | Low risk     | Compliance was recorded using personal interviews by study physicians and study nurses.          |
| Other bias                           | Low risk     | No commercial company involved, and no conflict of interest.                                     |

**Haywood CJ et al.2017**

Methods RCT, ( VLCD vs. hypocaloric diet, VLCD vs. healthy eating



|               |                                                                                                                                                                                                                                                                                                                                                                                                                                                                                                                                                                   |
|---------------|-------------------------------------------------------------------------------------------------------------------------------------------------------------------------------------------------------------------------------------------------------------------------------------------------------------------------------------------------------------------------------------------------------------------------------------------------------------------------------------------------------------------------------------------------------------------|
|               | advice)<br>12 weeks<br>Summary risk of bias: low to moderate                                                                                                                                                                                                                                                                                                                                                                                                                                                                                                      |
| Participants  | Volunteers were eligible if they were $\geq 65$ years, community dwelling, and had a BMI of $\geq 32$ kg/m <sup>2</sup> .<br>N: 41 intervention, 36 control①, 40 control②<br>Gender: 16 males/25 females intervention, 13 males/23 females control①, 16 males /24 females control②<br>Location: Australia                                                                                                                                                                                                                                                         |
| Interventions | Type: VLCD<br>Comparison: VLCD vs. hypocaloric diet, VLCD vs. healthy eating advice<br>Intervention: Two to three meals of the day were replaced with Optifast (Nestle Nutrition)<br>Control①: Participants received healthy eating advice<br>Control②: The diets were nutritionally complete with a 500 kCal/d energy deficit<br>Compliance: Participants visited a physician at the study centre fortnightly, and their weight, waist circumference and blood pressure was measured. Dietitian review occurred fortnightly.<br>Length of intervention: 12 weeks |
| Outcomes      | Main study outcome: Physical function; Anthropometry and body composition; Nutritional parameters<br>Dropouts: 4 intervention, 7 control①, 4 control②<br>Available outcomes: anthropometric index                                                                                                                                                                                                                                                                                                                                                                 |

### ***Risk of bias***

| <b>Bias</b>                                                               | <b>Authors' judgment</b> | <b>Support for judgment</b>                                                                                                                                  |
|---------------------------------------------------------------------------|--------------------------|--------------------------------------------------------------------------------------------------------------------------------------------------------------|
| Random sequence generation<br>(selection bias)                            | Low risk                 | This was a randomized clinical trial.                                                                                                                        |
| Allocation concealment<br>(selection bias)                                | Low risk                 | Participants were randomized according to a computer generated algorithm with block size of 4, and stratified by gender and the presence of type 2 diabetes. |
| Blinding of participants and personnel (performance bias)<br>All outcomes | High risk                | For safety reasons the investigator was aware of treatment group.                                                                                            |
| Blinding of outcome assessment (detection bias)<br>All outcomes           | Low risk                 | Assessors blinded to group allocation performed physical function testing.                                                                                   |
| Incomplete outcome data<br>(attrition bias)                               | Low risk                 | Participant flow well described.                                                                                                                             |

| All outcomes                         |          |                                                                                                                                                                                 |
|--------------------------------------|----------|---------------------------------------------------------------------------------------------------------------------------------------------------------------------------------|
| Selective reporting (reporting bias) | Low risk | Clinical Trial Center by code no.ACTRN12611000408987                                                                                                                            |
| Attention                            | Low risk | All participants appear to have had similar frequency and quantity of attention and follow-up.                                                                                  |
| Compliance                           | Low risk | Participants visited a physician at the study centre fortnightly, and their weight, waist circumference and blood pressure was measured. Dietitian review occurred fortnightly. |
| Other bias                           | Low risk | No commercial company involved, and no conflict of interest.                                                                                                                    |

**Hussin NM et al.2013**

Methods RCT, ( VLCD vs. control group)

|               |                                                                                                                                                                                                                                                                                                                                                                                                                                |
|---------------|--------------------------------------------------------------------------------------------------------------------------------------------------------------------------------------------------------------------------------------------------------------------------------------------------------------------------------------------------------------------------------------------------------------------------------|
|               | 12 weeks<br>Summary risk of bias: high                                                                                                                                                                                                                                                                                                                                                                                         |
| Participants  | Healthy Malay men (free from any uncontrolled chronic diseases), 50 to 70 years of age, BMI 23.0 to 29.9 kg/m <sup>2</sup> , with no history of mental or physical disabilities were eligible to participate in this study.<br>N: 16 intervention, 15 control<br>Age in years (Mean±SD): 59.7±6.6 intervention, 59.7±6.2 control<br>Gender: 16 males/0 females intervention, 15 males /0 females control<br>Location: Malaysia |
| Interventions | Type: VLCD<br>Comparison: VLCD vs. control group<br>Intervention: 300-500kcal/day<br>Control: normal diet<br>Compliance: Food Intake Measures for Assessment of Compliance. Compliance was assessed using fasting logs, food diaries, from weekly phone check in logs and verification of the information obtained using surrogate information obtained from participants' family members.<br>Length of intervention: 12 weeks |
| Outcomes      | Main study outcome: Profile of Mood States; Tension Mood; Anger Mood; Vigor Mood; Confusion Mood; Total Mood Disturbance; Depression<br>Dropouts: 0 intervention, 1 control<br>Available outcomes: anthropometric index                                                                                                                                                                                                        |

### ***Risk of bias***

| <b>Bias</b>                                                               | <b>Authors' judgment</b> | <b>Support for judgment</b>                                                                |
|---------------------------------------------------------------------------|--------------------------|--------------------------------------------------------------------------------------------|
| Random sequence generation<br>(selection bias)                            | Low risk                 | This was a randomized clinical trial.                                                      |
| Allocation concealment<br>(selection bias)                                | Unclear risk             | Not mentioned.                                                                             |
| Blinding of participants and personnel (performance bias)<br>All outcomes | High risk                | Participants and research dietitians delivering intervention content could not be blinded. |
| Blinding of outcome assessment (detection bias)<br>All outcomes           | High risk                | No blinded.                                                                                |
| Incomplete outcome data<br>(attrition bias)<br>All outcomes               | Low risk                 | Participant flow well described.                                                           |
| Selective reporting (reporting)                                           | Unclear risk             | Although the design accorded to                                                            |

|            |              |                                                                                                                                                                                                                                                                   |
|------------|--------------|-------------------------------------------------------------------------------------------------------------------------------------------------------------------------------------------------------------------------------------------------------------------|
| bias)      |              | RCT specifications, the clinical registration number was lacked.                                                                                                                                                                                                  |
| Attention  | Low risk     | All participants appear to have had similar frequency and quantity of attention and follow-up.                                                                                                                                                                    |
| Compliance | Low risk     | Food Intake Measures for Assessment of Compliance. Compliance was assessed using fasting logs, food diaries, from weekly phone check in logs and verification of the information obtained using surrogate information obtained from participants' family members. |
| Other bias | Unclear risk | evaluation comprehensively                                                                                                                                                                                                                                        |

|               |                                                                                                                                                                                                                                                                                                                                                                                                                 |
|---------------|-----------------------------------------------------------------------------------------------------------------------------------------------------------------------------------------------------------------------------------------------------------------------------------------------------------------------------------------------------------------------------------------------------------------|
| Methods       | RCT, ( VLCD vs. normal diet)<br>2 weeks<br>Summary risk of bias: low to moderate                                                                                                                                                                                                                                                                                                                                |
| Participants  | patients with symptomatic gallstones and BMI >30 kg/m <sup>2</sup> 46 patients were randomized to a VLCD or normal diet for two weeks.<br>N: 21 intervention, 25 control<br>Age in years (Mean±SD): 43.5±31.1 intervention, 48±35.5 control<br>Gender: 0 males/21 females intervention, 4 males /21 females control<br>Location: UK                                                                             |
| Interventions | Type: VLCD<br>Comparison: VLCD vs. normal diet<br>Intervention: The VLCD comprised a two week calorie-restricted diet aiming for a total calorific intake of 800 Kcal/day<br>Control: normal diet<br>Compliance: Dietician advice was available to both arms of the study. All patients were asked to complete a detailed dietary survey for the two weeks prior to surgery.<br>Length of intervention: 2 weeks |
| Outcomes      | Main study outcome: The primary outcome measure of this study was operative time, measured from first incision to end of skin closure.<br>Dropouts: 0<br>Available outcomes: anthropometric index                                                                                                                                                                                                               |

### ***Risk of bias***

| <b>Bias</b>                                                               | <b>Authors' judgment</b> | <b>Support for judgment</b>                                                                                                                                                                                                                      |
|---------------------------------------------------------------------------|--------------------------|--------------------------------------------------------------------------------------------------------------------------------------------------------------------------------------------------------------------------------------------------|
| Random sequence generation<br>(selection bias)                            | Low risk                 | This was a randomized clinical trial.                                                                                                                                                                                                            |
| Allocation concealment<br>(selection bias)                                | Low risk                 | Randomisation was performed using a computer-generated random number list (Microsoft Excel) with the necessary information (very low calorie diet or control group) being sealed in numeric order envelopes by someone independent of the study. |
| Blinding of participants and personnel (performance bias)<br>All outcomes | High risk                | Participants and research dietitians delivering intervention content could not be blinded.                                                                                                                                                       |
| Blinding of outcome assessment (detection bias)<br>All outcomes           | Low risk                 | This was a single centre, blinded, prospective, randomized controlled trial                                                                                                                                                                      |

|                                                             |          |                                                                                                                                                             |
|-------------------------------------------------------------|----------|-------------------------------------------------------------------------------------------------------------------------------------------------------------|
| Incomplete outcome data<br>(attrition bias)<br>All outcomes | Low risk | There was no drop out.                                                                                                                                      |
| Selective reporting (reporting<br>bias)                     | Low risk | REC number 10/H0305/78                                                                                                                                      |
| Attention                                                   | Low risk | The anaesthetic regime was the same for each patient, all patients underwent routine therapy.                                                               |
| Compliance                                                  | Low risk | Dietician advice was available to both arms of the study. All patients were asked to complete a detailed dietary survey for the two weeks prior to surgery. |
| Other bias                                                  | Low risk | No commercial company involved, and no conflict of interest.                                                                                                |

|               |                                                                                                                                                                                                                                                                                                                                                                                                                                |
|---------------|--------------------------------------------------------------------------------------------------------------------------------------------------------------------------------------------------------------------------------------------------------------------------------------------------------------------------------------------------------------------------------------------------------------------------------|
| Methods       | RCT, ( VLCD vs. control group)<br>12 weeks<br>Summary risk of bias: high                                                                                                                                                                                                                                                                                                                                                       |
| Participants  | Healthy Malay men (free from any uncontrolled chronic diseases), 50 to 70 years of age, BMI 23.0 to 29.9 kg/m <sup>2</sup> , with no history of mental or physical disabilities were eligible to participate in this study.<br>N: 12 intervention, 13 control<br>Age in years (Mean±SD): 59.3±3.4 intervention, 58.3±6.3 control<br>Gender: 12 males/0 females intervention, 13 males /0 females control<br>Location: Malaysia |
| Interventions | Type: VLCD<br>Comparison: VLCD vs. control group<br>Intervention: 300-500kcal/day<br>Control: normal diet<br>Compliance: Food Intake Measures for Assessment of Compliance. Compliance was assessed using fasting logs, food diaries, from weekly phone check in logs and verification of the information obtained using surrogate information obtained from participants' family members.<br>Length of intervention: 12 weeks |
| Outcomes      | Main study outcome: Food intake and body composition; Quality of life<br>Dropouts: 2 intervention, 1 control<br>Available outcomes: anthropometric index                                                                                                                                                                                                                                                                       |

### ***Risk of bias***

| <b>Bias</b>                                                               | <b>Authors' judgment</b> | <b>Support for judgment</b>                                                                |
|---------------------------------------------------------------------------|--------------------------|--------------------------------------------------------------------------------------------|
| Random sequence generation<br>(selection bias)                            | Low risk                 | This was a randomized clinical trial.                                                      |
| Allocation concealment<br>(selection bias)                                | Unclear risk             | Not mentioned.                                                                             |
| Blinding of participants and personnel (performance bias)<br>All outcomes | High risk                | Participants and research dietitians delivering intervention content could not be blinded. |
| Blinding of outcome assessment (detection bias)<br>All outcomes           | High risk                | No blinded.                                                                                |
| Incomplete outcome data<br>(attrition bias)<br>All outcomes               | Low risk                 | Participant flow well described.                                                           |
| Selective reporting (reporting)                                           | Unclear risk             | Although the design accorded to                                                            |

|            |              |                                                                                                                                                                                                                                                                   |
|------------|--------------|-------------------------------------------------------------------------------------------------------------------------------------------------------------------------------------------------------------------------------------------------------------------|
| bias)      |              | RCT specifications, the clinical registration number was lacked.                                                                                                                                                                                                  |
| Attention  | Low risk     | All participants appear to have had similar frequency and quantity of attention and follow-up.                                                                                                                                                                    |
| Compliance | Low risk     | Food Intake Measures for Assessment of Compliance. Compliance was assessed using fasting logs, food diaries, from weekly phone check in logs and verification of the information obtained using surrogate information obtained from participants' family members. |
| Other bias | Unclear risk | evaluation comprehensively                                                                                                                                                                                                                                        |



|               |                                                                                                                                                                                                                                                                                                                                                                                                                                                                                                                              |
|---------------|------------------------------------------------------------------------------------------------------------------------------------------------------------------------------------------------------------------------------------------------------------------------------------------------------------------------------------------------------------------------------------------------------------------------------------------------------------------------------------------------------------------------------|
| Methods       | RCT, ( VLCD vs. low-calorie diet (LCD))<br>8 weeks<br>Summary risk of bias: high                                                                                                                                                                                                                                                                                                                                                                                                                                             |
| Participants  | Forty-five obese patients (12 male and 33 female) were treated either by the VLCD or by the supplemental LCD, randomly, at an outpatient clinic.<br>N: 20 intervention, 25 control<br>Age in years (Mean±SD): 31.6±13.1 intervention, 35.3±11.7 control<br>Location: Japan                                                                                                                                                                                                                                                   |
| Interventions | Type: VLCD<br>Comparison: VLCD vs. LCD<br>Intervention: Twenty obese patients (31.6±13.1y; BMI 32.9±6.1) were treated for 1-2 month by the VLCD with use of five packages of Optifast 70. This provided a daily energy intake of 1757 kJ.<br>Control: Another 25 patients were treated for 1-2 month by the supplemental LCD of 3515-5021 kJ/d<br>Compliance: All the patients attended our outpatient clinic and their body weights were measured every other week during the treatment.<br>Length of intervention: 8 weeks |
| Outcomes      | Main study outcome: anthropometric and metabolic index<br>Dropouts: 0<br>Available outcomes: anthropometric and metabolic index                                                                                                                                                                                                                                                                                                                                                                                              |

### ***Risk of bias***

| <b>Bias</b>                                                               | <b>Authors' judgment</b> | <b>Support for judgment</b>                                                                      |
|---------------------------------------------------------------------------|--------------------------|--------------------------------------------------------------------------------------------------|
| Random sequence generation<br>(selection bias)                            | Low risk                 | This was a randomized clinical trial.                                                            |
| Allocation concealment<br>(selection bias)                                | High risk                | Obviously not used.                                                                              |
| Blinding of participants and personnel (performance bias)<br>All outcomes | High risk                | Participants and research dietitians delivering intervention content could not be blinded.       |
| Blinding of outcome assessment (detection bias)<br>All outcomes           | High risk                | No blinded.                                                                                      |
| Incomplete outcome data<br>(attrition bias)<br>All outcomes               | Low risk                 | Participant flow well described.                                                                 |
| Selective reporting (reporting bias)                                      | Unclear risk             | Although the design accorded to RCT specifications, the clinical registration number was lacked. |

|            |              |                                                                                                                             |
|------------|--------------|-----------------------------------------------------------------------------------------------------------------------------|
| Attention  | Low risk     | All participants appear to have had similar frequency and quantity of attention and follow-up.                              |
| Compliance | Low risk     | All the patients attended our outpatient clinic and their body weights were measured every other week during the treatment. |
| Other bias | Unclear risk | evaluation comprehensively                                                                                                  |

|               |                                                                                                                                                                                                                                                                                                                                                                                                                                |
|---------------|--------------------------------------------------------------------------------------------------------------------------------------------------------------------------------------------------------------------------------------------------------------------------------------------------------------------------------------------------------------------------------------------------------------------------------|
| Methods       | RCT, ( VLCD vs. control group)<br>12 weeks<br>Summary risk of bias: high                                                                                                                                                                                                                                                                                                                                                       |
| Participants  | Healthy Malay men (free from any uncontrolled chronic diseases), 50 to 70 years of age, BMI 23.0 to 29.9 kg/m <sup>2</sup> , with no history of mental or physical disabilities were eligible to participate in this study.<br>N: 28 intervention, 28 control<br>Age in years (Mean±SD): 59.6±5.4 intervention, 59.1±6.2 control<br>Gender: 28 males/0 females intervention, 28 males /0 females control<br>Location: Malaysia |
| Interventions | Type: VLCD<br>Comparison: VLCD vs. control group<br>Intervention: 300-500kcal/day<br>Control: normal diet<br>Compliance: Subjects were contacted once a week via telephone calls. Family members, especially the spouse, were also interviewed to obtain information regarding subjects' dietary intake.<br>Length of intervention: 12 weeks                                                                                   |
| Outcomes      | Main study outcome: anthropometric and metabolic index<br>Dropouts: 0<br>Available outcomes: anthropometric and metabolic index                                                                                                                                                                                                                                                                                                |

### ***Risk of bias***

| <b>Bias</b>                                                               | <b>Authors' judgment</b> | <b>Support for judgment</b>                                                                      |
|---------------------------------------------------------------------------|--------------------------|--------------------------------------------------------------------------------------------------|
| Random sequence generation<br>(selection bias)                            | Low risk                 | This was a randomized clinical trial.                                                            |
| Allocation concealment<br>(selection bias)                                | Unclear risk             | Not mentioned.                                                                                   |
| Blinding of participants and personnel (performance bias)<br>All outcomes | High risk                | Participants and research dietitians delivering intervention content could not be blinded.       |
| Blinding of outcome assessment (detection bias)<br>All outcomes           | High risk                | No blinded.                                                                                      |
| Incomplete outcome data<br>(attrition bias)<br>All outcomes               | Low risk                 | There was no drop out.                                                                           |
| Selective reporting (reporting bias)                                      | Unclear risk             | Although the design accorded to RCT specifications, the clinical registration number was lacked. |

|            |              |                                                                                                                                                                                 |
|------------|--------------|---------------------------------------------------------------------------------------------------------------------------------------------------------------------------------|
| Attention  | Low risk     | All participants appear to have had similar frequency and quantity of attention and follow-up.                                                                                  |
| Compliance | Low risk     | Subjects were contacted once a week via telephone calls. Family members, especially the spouse, were also interviewed to obtain information regarding subjects' dietary intake. |
| Other bias | Unclear risk | evaluation comprehensively                                                                                                                                                      |

|               |                                                                                                                                                                                                                                                                                                                                                              |
|---------------|--------------------------------------------------------------------------------------------------------------------------------------------------------------------------------------------------------------------------------------------------------------------------------------------------------------------------------------------------------------|
| Methods       | RCT, ( VLCD vs. intensive conventional diet(ICD))<br>12 weeks<br>Summary risk of bias: high                                                                                                                                                                                                                                                                  |
| Participants  | 52 subjects were successfully recruited into the group of their preference.<br>N: 14 intervention, 14 control<br>Age in years (Mean±SD): 53.9±5.7 intervention, 55.4±7.3 control<br>Gender: 7 males/7 females intervention, 3 males /11 females control<br>Location: UK                                                                                      |
| Interventions | Type: VLCD<br>Comparison: VLCD vs. ICD<br>Intervention: The formula used was Lipotrim, providing 400-700kcal/day for women and 540-670kcal/day for men.<br>Control: intensive conventional diet<br>Compliance: These sessions were run by two nurses with the counsellor and medical practitioner available as required.<br>Length of intervention: 12 weeks |
| Outcomes      | Main study outcome: anthropometric and metabolic index<br>Dropouts: 5<br>Available outcomes: anthropometric and metabolic index                                                                                                                                                                                                                              |

### ***Risk of bias***

| <b>Bias</b>                                                                  | <b>Authors' judgment</b> | <b>Support for judgment</b>                                                                            |
|------------------------------------------------------------------------------|--------------------------|--------------------------------------------------------------------------------------------------------|
| Random sequence generation<br>(selection bias)                               | Unclear risk             | Not mentioned.                                                                                         |
| Allocation concealment<br>(selection bias)                                   | High risk                | Obviously not used.                                                                                    |
| Blinding of participants and<br>personnel (performance bias)<br>All outcomes | High risk                | Participants and research<br>dietitians delivering intervention<br>content could not be blinded.       |
| Blinding of outcome<br>assessment (detection bias)<br>All outcomes           | High risk                | No blinded.                                                                                            |
| Incomplete outcome data<br>(attrition bias)<br>All outcomes                  | Unclear risk             | Reason of dropout was not<br>mentioned.                                                                |
| Selective reporting (reporting<br>bias)                                      | Unclear risk             | Although the design accorded to<br>RCT specifications, the clinical<br>registration number was lacked. |
| Attention                                                                    | Low risk                 | All participants appear to have<br>had similar frequency and<br>quantity of attention and follow-      |

|            |           |                                                                                                           |
|------------|-----------|-----------------------------------------------------------------------------------------------------------|
|            |           | up.                                                                                                       |
| Compliance | Low risk  | These sessions were run by two nurses with the counsellor and medical practitioner available as required. |
| Other bias | High risk | evaluation comprehensively                                                                                |

|               |                                                                                                                                                                                                                                                                                                                                                                                                             |
|---------------|-------------------------------------------------------------------------------------------------------------------------------------------------------------------------------------------------------------------------------------------------------------------------------------------------------------------------------------------------------------------------------------------------------------|
| Methods       | RCT, ( VLCD vs. ICD)<br>16 weeks<br>Summary risk of bias: high                                                                                                                                                                                                                                                                                                                                              |
| Participants  | Newspaper advertisements were used to recruit overweight persons with type II diabetes who were either more than 30% or more than 18 kg above ideal body weight based on Metropolitan Life Insurance norms.<br>N: 45 intervention, 48 control<br>Age in years (Mean±SD): 52.3±10.7 intervention, 51.3±8.7 control<br>Gender: 15 males/30 females intervention, 18 males /30 females control<br>Location: US |
| Interventions | Type: VLCD<br>Comparison: VLCD vs. ICD<br>Intervention: The VLCD group was prescribed a diet of 400 to 500 kcal per day.<br>Control: The LCD group was assigned a calorie intake goal of 1,000 to 1,200 kcal per day throughout the program.<br>Length of intervention: 16 weeks                                                                                                                            |
| Outcomes      | Main study outcome: Weight Loss; Glycemic Control; Changes in Cardiovascular Risk Factors; Psychologic Changes and Responses to the VLCD<br>Dropouts: 0<br>Available outcomes: anthropometric and metabolic index                                                                                                                                                                                           |

***Risk of bias***

| <b>Bias</b>                                                               | <b>Authors' judgment</b> | <b>Support for judgment</b>                                                                      |
|---------------------------------------------------------------------------|--------------------------|--------------------------------------------------------------------------------------------------|
| Random sequence generation<br>(selection bias)                            | Low risk                 | This was a randomized clinical trial.                                                            |
| Allocation concealment<br>(selection bias)                                | High risk                | Obviously not used.                                                                              |
| Blinding of participants and personnel (performance bias)<br>All outcomes | High risk                | Participants and research dietitians delivering intervention content could not be blinded.       |
| Blinding of outcome assessment (detection bias)<br>All outcomes           | High risk                | No blinded.                                                                                      |
| Incomplete outcome data<br>(attrition bias)<br>All outcomes               | Low risk                 | No dropout.                                                                                      |
| Selective reporting (reporting bias)                                      | Unclear risk             | Although the design accorded to RCT specifications, the clinical registration number was lacked. |

---

|            |              |                                                                                                |
|------------|--------------|------------------------------------------------------------------------------------------------|
| Attention  | Low risk     | All participants appear to have had similar frequency and quantity of attention and follow-up. |
| Compliance | Unclear risk | Not mentioned.                                                                                 |
| Other bias | Unclear risk | evaluation comprehensively                                                                     |

---



|               |                                                                                                                                                                                                                                                                                                                                                                                                                                                 |
|---------------|-------------------------------------------------------------------------------------------------------------------------------------------------------------------------------------------------------------------------------------------------------------------------------------------------------------------------------------------------------------------------------------------------------------------------------------------------|
| Methods       | RCT, ( VLCD vs. regular dietary and behavioural support)<br>12 weeks<br>Summary risk of bias: moderate                                                                                                                                                                                                                                                                                                                                          |
| Participants  | 113 obese men and women aged 37–58y, BMI>32.0kg/m <sup>2</sup> , participating in the Swedish Obese Subjects (SOS) study.<br>N: 58 intervention, 55 control<br>Age in years (Mean±SD): 47.3±6.7 intervention, 46.9±5.8 control<br>Gender: 22 males/36 females intervention, 17 males /38 females control<br>Location: Sweden                                                                                                                    |
| Interventions | Type: VLCD<br>Comparison: VLCD vs. regular dietary and behavioral support<br>Intervention: Subjects in the VLCD-group were provided with 1909–2545kJ/d (456–608kcal/d).<br>Control: Received supportive program only.<br>Compliance: patients met a dietitian for individual nutritional counseling. Food records were kept for 4d before each visit and analyzed records were discussed with each patient.<br>Length of intervention: 12 weeks |
| Outcomes      | Main study outcome: Weight loss<br>Dropouts: 0<br>Available outcomes: Weight loss                                                                                                                                                                                                                                                                                                                                                               |

***Risk of bias***

| <b>Bias</b>                                                               | <b>Authors' judgment</b> | <b>Support for judgment</b>                                                                                                                                                                                                         |
|---------------------------------------------------------------------------|--------------------------|-------------------------------------------------------------------------------------------------------------------------------------------------------------------------------------------------------------------------------------|
| Random sequence generation<br>(selection bias)                            | Low risk                 | This was a randomized clinical trial.                                                                                                                                                                                               |
| Allocation concealment<br>(selection bias)                                | Low risk                 | Subjects were randomized consecutively to either treatment group, using a set of 100 sealed envelopes per hospital, prepared in random order by a staff member at the SOS-secretariat who did not participate further in the study. |
| Blinding of participants and personnel (performance bias)<br>All outcomes | High risk                | Participants and research dietitians delivering intervention content could not be blinded.                                                                                                                                          |
| Blinding of outcome assessment (detection bias)<br>All outcomes           | High risk                | No blinded.                                                                                                                                                                                                                         |
| Incomplete outcome data<br>(attrition bias)<br>All outcomes               | Low risk                 | No dropout.                                                                                                                                                                                                                         |

|                                      |              |                                                                                                                                                                        |
|--------------------------------------|--------------|------------------------------------------------------------------------------------------------------------------------------------------------------------------------|
| Selective reporting (reporting bias) | Unclear risk | Although the design accorded to RCT specifications, the clinical registration number was lacked.                                                                       |
| Attention                            | Low risk     | No problem with attention bias.                                                                                                                                        |
| Compliance                           | Low risk     | patients met a dietitian for individual nutritional counseling. Food records were kept for 4d before each visit and analyzed records were discussed with each patient. |
| Other bias                           | Low risk     | No commercial company involved, and no conflict of interest.                                                                                                           |

|               |                                                                                                                                                                                                                                                                                                                 |
|---------------|-----------------------------------------------------------------------------------------------------------------------------------------------------------------------------------------------------------------------------------------------------------------------------------------------------------------|
| Methods       | RCT, ( VLCD vs. balanced deficit diet (BDD))<br>16 weeks<br>Summary risk of bias: high                                                                                                                                                                                                                          |
| Participants  | Subjects were 49 women with a mean age of 39.31 years, height of 164.38 cm, weight of 106.33 kg, and BMI of 39.46.<br>N: 26 intervention, 17 control<br>Age in years (Mean±SD): 36.8±8.9 intervention, 42.9±10.1control<br>Gender: 0 males/28 females intervention, 0 males /21 females control<br>Location: US |
| Interventions | Type: VLCD<br>Comparison: VLCD vs. BDD<br>Intervention: 420 kcal/d<br>Control: 1200 kcal/day<br>Compliance: The procedure was supervised by the dietitian.<br>Length of intervention: 16 weeks                                                                                                                  |
| Outcomes      | Main study outcome: Weight and body composition; Mood and binge eating<br>Dropouts: 6<br>Available outcomes: Weight and body composition                                                                                                                                                                        |
| Notes         | The variable of gender and age include dropout.                                                                                                                                                                                                                                                                 |

### ***Risk of bias***

| <b>Bias</b>                                                               | <b>Authors' judgment</b> | <b>Support for judgment</b>                                                                      |
|---------------------------------------------------------------------------|--------------------------|--------------------------------------------------------------------------------------------------|
| Random sequence generation<br>(selection bias)                            | Low risk                 | This was a randomized clinical trial.                                                            |
| Allocation concealment<br>(selection bias)                                | Unclear risk             | Not mentioned.                                                                                   |
| Blinding of participants and personnel (performance bias)<br>All outcomes | High risk                | Participants and research dietitians delivering intervention content could not be blinded.       |
| Blinding of outcome assessment (detection bias)<br>All outcomes           | High risk                | No blinded.                                                                                      |
| Incomplete outcome data<br>(attrition bias)<br>All outcomes               | Unclear risk             | Reason of dropout was not mentioned.                                                             |
| Selective reporting (reporting bias)                                      | Unclear risk             | Although the design accorded to RCT specifications, the clinical registration number was lacked. |
| Attention                                                                 | Low risk                 | No problem with attention bias.                                                                  |
| Compliance                                                                | Low risk                 | The procedure was supervised by the dietitian.                                                   |

---

Other bias

Low risk

No commercial company  
involved, and no conflict of  
interest.

---

|               |                                                                                                                                                                                                                                                                                                                                                                                                                                                                                                                                                                                                                                |
|---------------|--------------------------------------------------------------------------------------------------------------------------------------------------------------------------------------------------------------------------------------------------------------------------------------------------------------------------------------------------------------------------------------------------------------------------------------------------------------------------------------------------------------------------------------------------------------------------------------------------------------------------------|
| Methods       | RCT, (rapid weight loss programme vs. gradual weight loss programme)<br>12 weeks<br>Summary risk of bias: low to moderate                                                                                                                                                                                                                                                                                                                                                                                                                                                                                                      |
| Participants  | Eligible patients at screening were obese (BMI 30.0–45.0 kg/m <sup>2</sup> ), otherwise healthy, and aged between 18 and 70 years.<br>N: 76 intervention, 51 control<br>Age in years (Mean±SD): 49.6±10.9 intervention, 50.1±11.1 control<br>Gender: 26 males/71 females intervention, 25 males /78 females control<br>Location: Australia                                                                                                                                                                                                                                                                                     |
| Interventions | Type: VLCD<br>Comparison: rapid weight loss programme vs. gradual weight loss programme<br>Intervention: participants consumed a commercially available very low energy diet preparation according to the manufacturer's recommendations, for 12 weeks. This diet contains between 450 and 800 kcal per day.<br>Control: participants consumed an energy-reduced diet (400–500 kcal per day deficit), on the basis of recommendations in the Australian Guide to Healthy Eating.<br>Compliance: Adherence to the diets was estimated by the rate at which participants were losing weight.<br>Length of intervention: 12 weeks |
| Outcomes      | Main study outcome: weight loss<br>Dropouts: 21 intervention/ 52 control<br>Available outcomes: Weight and body composition                                                                                                                                                                                                                                                                                                                                                                                                                                                                                                    |
| Notes         | The variable of gender and age include dropout.                                                                                                                                                                                                                                                                                                                                                                                                                                                                                                                                                                                |

### ***Risk of bias***

| <b>Bias</b>                                                               | <b>Authors' judgment</b> | <b>Support for judgment</b>                                                                                                                  |
|---------------------------------------------------------------------------|--------------------------|----------------------------------------------------------------------------------------------------------------------------------------------|
| Random sequence generation<br>(selection bias)                            | Low risk                 | This was a randomized clinical trial.                                                                                                        |
| Allocation concealment<br>(selection bias)                                | Low risk                 | Randomisation was done with a computer-generated randomization sequence with a block design accounting for the potential confounding factors |
| Blinding of participants and personnel (performance bias)<br>All outcomes | High risk                | Participants, dietitians, study investigators, and research staff who did the assessments were not masked to treatment assignments.          |
| Blinding of outcome assessment (detection bias)                           | Low risk                 | Laboratory staff was masked to treatment assignments.                                                                                        |

|                                             |          |                                                                                                  |
|---------------------------------------------|----------|--------------------------------------------------------------------------------------------------|
| All outcomes                                |          |                                                                                                  |
| Incomplete outcome data<br>(attrition bias) | Low risk | Participant flow well described.                                                                 |
| All outcomes                                |          |                                                                                                  |
| Selective reporting (reporting<br>bias)     | Low risk | Trial registry code:<br>ACTRN12611000190909                                                      |
| Attention                                   | Low risk | No problem with attention bias.                                                                  |
| Compliance                                  | Low risk | Adherence to the diets was<br>estimated by the rate at which<br>participants were losing weight. |
| Other bias                                  | Low risk | No commercial company<br>involved, and no conflict of<br>interest.                               |

|               |                                                                                                                                                                                                                                                                                                                                |
|---------------|--------------------------------------------------------------------------------------------------------------------------------------------------------------------------------------------------------------------------------------------------------------------------------------------------------------------------------|
| Methods       | RCT, (VLCD vs. control group)<br>8 weeks<br>Summary risk of bias: moderate                                                                                                                                                                                                                                                     |
| Participants  | Two groups of 19 obese patients with asthma (BMI (kg/m <sup>2</sup> ) 30 to 42) recruited through newspaper advertisements.<br>N: 19 intervention, 19 control<br>Location: Finland                                                                                                                                             |
| Interventions | Type: VLCD<br>Comparison: VLCD vs. control group<br>Intervention: The daily dose gave 1760 kJ of energy and contained daily allowances of all essential nutrients<br>Control: normal diet<br>Compliance: All participants received normal medical care throughout the study.<br>Length of intervention: 8 weeks                |
| Outcomes      | Main study outcome: Body weight, morning peak expiratory flow (PEF), forced vital capacity (FVC), forced expiratory volume in one second (FEV <sub>1</sub> ); and also asthma symptoms, number of acute episodes, courses of oral steroids, health status (quality of life).<br>Dropouts: 0<br>Available outcomes: Weight loss |

### ***Risk of bias***

| <b>Bias</b>                                                               | <b>Authors' judgment</b> | <b>Support for judgment</b>                                                                      |
|---------------------------------------------------------------------------|--------------------------|--------------------------------------------------------------------------------------------------|
| Random sequence generation (selection bias)                               | Low risk                 | This was a randomized clinical trial.                                                            |
| Allocation concealment (selection bias)                                   | Low risk                 | Randomization was by "shuffling cards," with the help of someone not involved in the study.      |
| Blinding of participants and personnel (performance bias)<br>All outcomes | High risk                | Participants and research dietitians delivering intervention content could not be blinded.       |
| Blinding of outcome assessment (detection bias)<br>All outcomes           | High risk                | No blinded.                                                                                      |
| Incomplete outcome data (attrition bias)<br>All outcomes                  | Low risk                 | No drop out.                                                                                     |
| Selective reporting (reporting bias)                                      | Unclear risk             | Although the design accorded to RCT specifications, the clinical registration number was lacked. |
| Attention                                                                 | Low risk                 | No problem with attention bias.                                                                  |
| Compliance                                                                | Low risk                 | All participants received normal                                                                 |

|            |          |                                                              |
|------------|----------|--------------------------------------------------------------|
|            |          | medical care throughout the study.                           |
| Other bias | Low risk | No commercial company involved, and no conflict of interest. |

**Wadden TA et al. 1986**

|               |                                                                                                                                                                                           |
|---------------|-------------------------------------------------------------------------------------------------------------------------------------------------------------------------------------------|
| Methods       | RCT, ( VLCD vs. control group)<br>8 weeks<br>Summary risk of bias: high                                                                                                                   |
| Participants  | N: 15 intervention, 16 control<br>Age in years (Mean±SD): 44.3±8.7 intervention, 44.3±8.6 control<br>Gender: 2 males/13 females intervention, 3 males /13 females control<br>Location: US |
| Interventions | Type: VLCD<br>Comparison: VLCD vs. control group                                                                                                                                          |



|          |                                                                                                                                                                                                                                                                                                                                                                                                                                                                                                                                               |
|----------|-----------------------------------------------------------------------------------------------------------------------------------------------------------------------------------------------------------------------------------------------------------------------------------------------------------------------------------------------------------------------------------------------------------------------------------------------------------------------------------------------------------------------------------------------|
|          | <p>Intervention: They consumed a very low calorie diet (400-500 kcal/day) consisting of lean meat, fish, and fowl.</p> <p>Control: Subjects consumed a 1000-1200-balanced calorie diet (of their choosing) throughout the study.</p> <p>Compliance: Two doctoral-level clinical psychologists led the groups, following procedures described in detailed treatment manuals, which differed for each condition. Each psychologist led at least one group in each of the three treatment conditions.</p> <p>Length of intervention: 8 weeks</p> |
| Outcomes | <p>Main study outcome: Weight loss; Blood Pressure; Depression</p> <p>Dropouts: 3 intervention, 2 control</p> <p>Available outcomes: Weight loss</p>                                                                                                                                                                                                                                                                                                                                                                                          |

***Risk of bias***

| <b>Bias</b>                                                               | <b>Authors' judgment</b> | <b>Support for judgment</b>                                                                                                                                                                                                                    |
|---------------------------------------------------------------------------|--------------------------|------------------------------------------------------------------------------------------------------------------------------------------------------------------------------------------------------------------------------------------------|
| Random sequence generation<br>(selection bias)                            | Low risk                 | This was a randomized clinical trial.                                                                                                                                                                                                          |
| Allocation concealment<br>(selection bias)                                | Unclear risk             | Not mentioned.                                                                                                                                                                                                                                 |
| Blinding of participants and personnel (performance bias)<br>All outcomes | High risk                | Participants and research dietitians delivering intervention content could not be blinded.                                                                                                                                                     |
| Blinding of outcome assessment (detection bias)<br>All outcomes           | High risk                | No blinded.                                                                                                                                                                                                                                    |
| Incomplete outcome data<br>(attrition bias)<br>All outcomes               | Unclear risk             | Reason of dropout was not mentioned.                                                                                                                                                                                                           |
| Selective reporting (reporting bias)                                      | Unclear risk             | Although the design accorded to RCT specifications, the clinical registration number was lacked.                                                                                                                                               |
| Attention                                                                 | Low risk                 | No problem with attention bias.                                                                                                                                                                                                                |
| Compliance                                                                | Low risk                 | Two doctoral-level clinical psychologists led the groups, following procedures described in detailed treatment manuals, which differed for each condition. Each psychologist led at least one group in each of the three treatment conditions. |
| Other bias                                                                | Unclear risk             | evaluation comprehensively                                                                                                                                                                                                                     |

**Tuomilehto H et al. 2010**

---

Methods

RCT, ( VLCD vs. control group)

12 weeks

Summary risk of bias: low to moderate

---

Participants

Eighty-one consecutive overweight adult patients with mild OSA were recruited.

N: 35 intervention, 36 control

Age in years (Mean±SD): 51.8±9.0 intervention, 51.7±8.8 control

Gender: 26 males/9 females intervention, 27 males /9 females control

Location: Finland

---

|                            |                                                                                                                                                                                                                                                                                                                                                                                                                                                                                                                                                                                                                                                                                        |                          |                                                                                                                                                                                                                         |
|----------------------------|----------------------------------------------------------------------------------------------------------------------------------------------------------------------------------------------------------------------------------------------------------------------------------------------------------------------------------------------------------------------------------------------------------------------------------------------------------------------------------------------------------------------------------------------------------------------------------------------------------------------------------------------------------------------------------------|--------------------------|-------------------------------------------------------------------------------------------------------------------------------------------------------------------------------------------------------------------------|
| Interventions              | <p>Type: VLCD</p> <p>Comparison: VLCD vs. control group</p> <p>Intervention: The intervention was initiated with a 12-wk VLCD providing 600–800 kcal/d.</p> <p>Control: standard diet</p> <p>Compliance: Compliance with the program was based on achieving the lifestyle goals agreed on by the nutritionist and the individual patient at the beginning of the intervention. The nutritionist provided face-to-face counseling individually tailored to each patient in the intervention group and also participated in the group sessions. The subjects in the control group were given standard care by the study nurse and physician.</p> <p>Length of intervention: 12 weeks</p> |                          |                                                                                                                                                                                                                         |
| Outcomes                   | <p>Main study outcome: anthropometric and metabolic index</p> <p>Dropouts: 5 intervention, 5 control</p> <p>Available outcomes: anthropometric and metabolic index</p>                                                                                                                                                                                                                                                                                                                                                                                                                                                                                                                 |                          |                                                                                                                                                                                                                         |
| <b><i>Risk of bias</i></b> |                                                                                                                                                                                                                                                                                                                                                                                                                                                                                                                                                                                                                                                                                        |                          |                                                                                                                                                                                                                         |
|                            | <b>Bias</b>                                                                                                                                                                                                                                                                                                                                                                                                                                                                                                                                                                                                                                                                            | <b>Authors' judgment</b> | <b>Support for judgment</b>                                                                                                                                                                                             |
|                            | Random sequence generation<br>(selection bias)                                                                                                                                                                                                                                                                                                                                                                                                                                                                                                                                                                                                                                         | Low risk                 | This was a randomized clinical trial.                                                                                                                                                                                   |
|                            | Allocation concealment<br>(selection bias)                                                                                                                                                                                                                                                                                                                                                                                                                                                                                                                                                                                                                                             | Low risk                 | A block randomization, but no stratification, was used in the allocation of the participants.                                                                                                                           |
|                            | Blinding of participants and personnel (performance bias)<br>All outcomes                                                                                                                                                                                                                                                                                                                                                                                                                                                                                                                                                                                                              | High risk                | Participants and research dietitians delivering intervention content could not be blinded.                                                                                                                              |
|                            | Blinding of outcome assessment (detection bias)<br>All outcomes                                                                                                                                                                                                                                                                                                                                                                                                                                                                                                                                                                                                                        | High risk                | No blinded.                                                                                                                                                                                                             |
|                            | Incomplete outcome data<br>(attrition bias)<br>All outcomes                                                                                                                                                                                                                                                                                                                                                                                                                                                                                                                                                                                                                            | Low risk                 | Participant flow well described.                                                                                                                                                                                        |
|                            | Selective reporting (reporting bias)                                                                                                                                                                                                                                                                                                                                                                                                                                                                                                                                                                                                                                                   | Low risk                 | Trial registry code:NCT00486746                                                                                                                                                                                         |
|                            | Attention                                                                                                                                                                                                                                                                                                                                                                                                                                                                                                                                                                                                                                                                              | Low risk                 | No problem with attention bias.                                                                                                                                                                                         |
|                            | Compliance                                                                                                                                                                                                                                                                                                                                                                                                                                                                                                                                                                                                                                                                             | Low risk                 | Compliance with the program was based on achieving the lifestyle goals agreed on by the nutritionist and the individual patient at the beginning of the intervention. The nutritionist provided face-to-face counseling |

|            |          |                                                                                                                                                                                                           |
|------------|----------|-----------------------------------------------------------------------------------------------------------------------------------------------------------------------------------------------------------|
|            |          | individually tailored to each patient in the intervention group and also participated in the group sessions. The subjects in the control group were given standard care by the study nurse and physician. |
| Other bias | Low risk | No commercial company involved, and no conflict of interest.                                                                                                                                              |

**Tuomilehto HP et al. 2009**

|              |                                                                                                                                                                                                                                                      |
|--------------|------------------------------------------------------------------------------------------------------------------------------------------------------------------------------------------------------------------------------------------------------|
| Methods      | RCT, ( VLCD vs. control group)<br>12 weeks<br>Summary risk of bias: moderate                                                                                                                                                                         |
| Participants | Eighty-one consecutive overweight adult patients with mild OSA were recruited.<br>N: 35 intervention, 37 control<br>Age in years (Mean±SD): 51.8±9.0 intervention, 50.9±8.6 control<br>Gender: 26 males/9 females intervention, 27 males /10 females |

|               |                                                                                                                                                                                                                                                                                                                                                                                  |
|---------------|----------------------------------------------------------------------------------------------------------------------------------------------------------------------------------------------------------------------------------------------------------------------------------------------------------------------------------------------------------------------------------|
|               | control<br>Location: Finland                                                                                                                                                                                                                                                                                                                                                     |
| Interventions | Type: VLCD<br>Comparison: VLCD vs. control group<br>Intervention: The intervention was initiated with a 12-wk VLCD providing 600–800 kcal/d.<br>Control: standard diet<br>Compliance: Compliance with the program and supervision for any possible adverse events were monitored by individual interviews at each visit by the nutritionist.<br>Length of intervention: 12 weeks |
| Outcomes      | Main study outcome: anthropometric and metabolic index<br>Dropouts: 5 intervention, 4 control<br>Available outcomes: anthropometric and metabolic index                                                                                                                                                                                                                          |

***Risk of bias***

| <b>Bias</b>                                                               | <b>Authors' judgment</b> | <b>Support for judgment</b>                                                                                                                            |
|---------------------------------------------------------------------------|--------------------------|--------------------------------------------------------------------------------------------------------------------------------------------------------|
| Random sequence generation<br>(selection bias)                            | Low risk                 | This was a randomized clinical trial.                                                                                                                  |
| Allocation concealment<br>(selection bias)                                | Low risk                 | A block randomization, but no stratification, was used in the allocation of the participants.                                                          |
| Blinding of participants and personnel (performance bias)<br>All outcomes | High risk                | Participants and research dietitians delivering intervention content could not be blinded.                                                             |
| Blinding of outcome assessment (detection bias)<br>All outcomes           | High risk                | No blinded.                                                                                                                                            |
| Incomplete outcome data<br>(attrition bias)<br>All outcomes               | Low risk                 | Participant flow well described.                                                                                                                       |
| Selective reporting (reporting bias)                                      | Unclear risk             | Although the design accorded to RCT specifications, the clinical registration number was lacked.                                                       |
| Attention                                                                 | Low risk                 | No problem with attention bias.                                                                                                                        |
| Compliance                                                                | Low risk                 | Compliance with the program and supervision for any possible adverse events were monitored by individual interviews at each visit by the nutritionist. |
| Other bias                                                                | Low risk                 | No commercial company involved, and no conflict of interest.                                                                                           |

**Wadden TA et al. 1988**

---

Methods

RCT, ( VLCD vs. control group)

8 weeks

Summary risk of bias: high

---

Participants

Subjects were the 43 women and 7 men

N: 15 intervention, 16 control

Age in years (Mean±SD): 44.3±8.7 intervention, 44.3±8.6 control

Gender: 2 males/13 females intervention, 3 males /13 females control

---

|               |                                                                                                                                                                                                                                                                                                                                                                                                                                                                                                                                                                                |
|---------------|--------------------------------------------------------------------------------------------------------------------------------------------------------------------------------------------------------------------------------------------------------------------------------------------------------------------------------------------------------------------------------------------------------------------------------------------------------------------------------------------------------------------------------------------------------------------------------|
|               | Location: US                                                                                                                                                                                                                                                                                                                                                                                                                                                                                                                                                                   |
| Interventions | Type: VLCD<br>Comparison: VLCD vs. control group<br>Intervention: They consumed a very low calorie diet (400-500 kcal/day) consisting of lean meat, fish, and fowl.<br>Control: Subjects consumed a 1000-1200-balanced calorie diet (of their choosing) throughout the study.<br>Compliance: Two doctoral-level clinical psychologists led the groups, following procedures described in detailed treatment manuals, which differed for each condition. Each psychologist led at least one group in each of the three treatment conditions.<br>Length of intervention: 8 weeks |
| Outcomes      | Main study outcome: Weight loss; Weight Regainers and Weight Maintainers; Psychological Functioning<br>Dropouts: 3 intervention, 2 control<br>Available outcomes: Weight loss                                                                                                                                                                                                                                                                                                                                                                                                  |

***Risk of bias***

| <b>Bias</b>                                                               | <b>Authors' judgment</b> | <b>Support for judgment</b>                                                                                                                                                                                        |
|---------------------------------------------------------------------------|--------------------------|--------------------------------------------------------------------------------------------------------------------------------------------------------------------------------------------------------------------|
| Random sequence generation<br>(selection bias)                            | Low risk                 | This was a randomized clinical trial.                                                                                                                                                                              |
| Allocation concealment<br>(selection bias)                                | Unclear risk             | Not mentioned.                                                                                                                                                                                                     |
| Blinding of participants and personnel (performance bias)<br>All outcomes | High risk                | Participants and research dietitians delivering intervention content could not be blinded.                                                                                                                         |
| Blinding of outcome assessment (detection bias)<br>All outcomes           | High risk                | No blinded.                                                                                                                                                                                                        |
| Incomplete outcome data<br>(attrition bias)<br>All outcomes               | Unclear risk             | Reason of dropout was not mentioned.                                                                                                                                                                               |
| Selective reporting (reporting bias)                                      | Unclear risk             | Although the design accorded to RCT specifications, the clinical registration number was lacked.                                                                                                                   |
| Attention                                                                 | Low risk                 | No problem with attention bias.                                                                                                                                                                                    |
| Compliance                                                                | Low risk                 | Two doctoral-level clinical psychologists led the groups, following procedures described in detailed treatment manuals, which differed for each condition. Each psychologist led at least one group in each of the |

|            |              |                             |
|------------|--------------|-----------------------------|
|            |              | three treatment conditions. |
| Other bias | Unclear risk | evaluation comprehensively  |

**Williams KV et al. 1998**

|              |                                                                                                                                                                             |
|--------------|-----------------------------------------------------------------------------------------------------------------------------------------------------------------------------|
| Methods      | RCT, ( PF vs. standard behavioral therapy)<br>20 weeks<br>Summary risk of bias: moderate to high                                                                            |
| Participants | Individuals with type 2 diabetes who were $\geq 20\%$ over ideal body weight participated in a 20-week behavioral weight control program.<br>N: 16 intervention, 14 control |



|               |                                                                                                                                                                                                                                                                                                                                                                                                        |
|---------------|--------------------------------------------------------------------------------------------------------------------------------------------------------------------------------------------------------------------------------------------------------------------------------------------------------------------------------------------------------------------------------------------------------|
|               | Age in years (Mean±SD): 51.4±7.9 intervention, 54.1±7.0 control<br>Gender: 9 males/9 females intervention, 7 males /11 females control<br>Location: US                                                                                                                                                                                                                                                 |
| Interventions | Type: PF<br>Comparison: PF vs. standard behavioral therapy<br>Intervention: 400-600 kcal/day<br>Control: 1,500-1,800 kcal/day<br>Compliance: A registered dietitian reviewed these diaries weekly and provided all subjects with individualized written comments regarding their reported diet and exercise in order to insure compliance with the study protocol.<br>Length of intervention: 20 weeks |
| Outcomes      | Main study outcome: anthropometric and metabolic index<br>Dropouts: 0<br>Available outcomes: anthropometric and metabolic index                                                                                                                                                                                                                                                                        |
| Notes         | The variable of gender and age include dropout.                                                                                                                                                                                                                                                                                                                                                        |

***Risk of bias***

| <b>Bias</b>                                                               | <b>Authors' judgment</b> | <b>Support for judgment</b>                                                                                                                                                                       |
|---------------------------------------------------------------------------|--------------------------|---------------------------------------------------------------------------------------------------------------------------------------------------------------------------------------------------|
| Random sequence generation<br>(selection bias)                            | Low risk                 | This was a randomized clinical trial.                                                                                                                                                             |
| Allocation concealment<br>(selection bias)                                | Unclear risk             | Not mentioned.                                                                                                                                                                                    |
| Blinding of participants and personnel (performance bias)<br>All outcomes | High risk                | Participants and research dietitians delivering intervention content could not be blinded.                                                                                                        |
| Blinding of outcome assessment (detection bias)<br>All outcomes           | High risk                | No blinded.                                                                                                                                                                                       |
| Incomplete outcome data<br>(attrition bias)<br>All outcomes               | Low risk                 | No drop out.                                                                                                                                                                                      |
| Selective reporting (reporting bias)                                      | Unclear risk             | Although the design accorded to RCT specifications, the clinical registration number was lacked.                                                                                                  |
| Attention                                                                 | Low risk                 | No problem with attention bias.                                                                                                                                                                   |
| Compliance                                                                | Low risk                 | A registered dietitian reviewed these diaries weekly and provided all subjects with individualized written comments regarding their reported diet and exercise in order to insure compliance with |

---

|            |          |                                                              |
|------------|----------|--------------------------------------------------------------|
|            |          | the study protocol.                                          |
| Other bias | Low risk | No commercial company involved, and no conflict of interest. |

---
